# Supplementary material
Source: PubMed Central journal article supplement (PMC3746844)
Supplement: 1221555110_pnas.201221555SI.pdf [file 1221555110_pnas.201221555SI.pdf]

# Supporting Information

Hertz et al. 10.1073/pnas.1221555110

## SI Materials and Methods

**HLA Targeting Efficiency.** The HLA targeting efficiency score quantifies the relationship between HLA binding and conservation of target peptides. More formally, the HLA targeting efficiency score is the Spearman correlation coefficient between binding scores and conservation scores for amino acids along a given protein. In principle, linear correlation factors may be used because both scores reflect log probabilities (binding energies vs. evolutionary rates). Negative scores denote a preference for binding to variable regions, and positive scores indicate a preference to bind to conserved regions. The process of computing the HLA targeting efficiency score is illustrated in Fig. 1.

**HLA Frequency Data.** HLA frequency data were obtained from the [www.allelefrequencies.net](http://www.allelefrequencies.net) Web site (1) using all the reported studies that had four-digit resolution HLA typing from around the world. Average HLA frequencies were computed using a weighted average of all reported studies for each country, based on each study sample size.

**pH1N1 Mortality Rates.** Pandemic H1N1 (pH1N1) death counts were obtained from the European Centre for Disease Prevention and Control (2), and were based on official reports from ministries of health in each country. Population sizes by country were obtained from the Central Intelligence Agency World Factbook (<https://www.cia.gov/library/publications/the-world-factbook/rankorder/2119rank.html>).

**Sequence Similarity Measures.** We defined a similarity measure over pairs of viruses that is based on the efficiency profiles of the set of 95 HLA alleles analyzed in this study. The similarity measure is defined by the Spearman correlation coefficient between HLA targeting efficiency profiles. We compare this similarity measure to an alignment method based on the standard Needleman–Wunsch (NW) global alignment algorithm (3). The alignment score of two sequences is defined by

$$S(s_1, s_2) = [1 - S_{NW}(s_1, s_2)] / S_{NW}(s_1, s_2) \\ * S_{NW}[1 - (s_1, s_2)] / S_{NW}(s_2, s_2),$$

where  $S_{NW}(s_1, s_2)$  is the NW score of sequences  $s_1$  and  $s_2$ .

**HLA Allele Determination.** Participant HLA alleles were determined using sample DNA quantitated and amplified with locus-specific primers followed by hybridization to Luminex flow beads (One Lambda) with bound oligonucleotides. Detection of the bound product was performed with a second fluorescent marker to identify the bound product and the specific oligonucleotide. Results were analyzed with Fusion 2.0 software. DNA sequencing (Abbott Molecular) was used as needed to clarify specific high-resolution HLA results and analyzed with Connexio software. For participants too young for conventional HLA allele determination by venipuncture, a sequence-based typing strategy was used on nasal swabs to determine exon 2 and exon 3 sequences for HLA class I analysis.

**Viruses.** A/California/04/2009 (H1N1), A/Brisbane/59/2007 (H1N1), and A/Brisbane/10/2007 (H3N2) were kindly provided by Richard J. Webby (St. Jude Children's Research Hospital).

**Binding Scores.** Binding scores were computed using the adaptive double-threading (ADT) prediction algorithm (4), which esti-

mates the binding affinity of a peptide–HLA complex and provides state-of-the-art predictions of HLA-peptide binding affinities (5). More formally, given a 9-mer peptide  $p = (p_1, p_2, \dots, p_9)$  and an HLA allele  $h$ , the algorithm estimates the binding energy  $E_h(p) = E_h(p_1, p_2, \dots, p_9)$ . The model is fit to the logarithm  $IC_{50}$  measurements for different allele–peptide combinations. The probability of peptide presentation therefore is proportional to  $e^{-E_h(p)}$ , where low energy corresponds to high presentation probability, and vice versa. The log probability of presentation of a single site in a protein is computed by considering the presentation probabilities of all peptides straddling that site. As an estimate that is robust to prediction errors, we define the binding score  $B_h(i)$  for the  $i$ -th amino acid in the sequence  $S = (s_1, s_2, \dots, s_9)$  to be

$$B_h(i) = - \sum_{j=i-8}^i E_h(s_j, s_{j+1}, \dots, s_{j+8})$$

for  $9 \leq i \leq N - 9$ .

**Conservation Scores.** Conservation scores were computed using the ConSeq server (6, 7), which estimates the evolutionary rate for each position along a protein. We used the National Center for Biotechnology Information influenza database (8) to create curated alignments for each influenza protein (Table S1). Because of the large number of influenza sequences in the database, the conservation scores have narrow confidence intervals.

**HLA Predictor Accuracy.** The HLA predictions used in this study were provided by the ADT algorithm, which was benchmarked recently and found to be comparable with the state-of-the-art predictors (5). The ADT model used here was trained on ~40,000 HLA–peptide binding measurements, obtained from the Immune Epitope Database (9). This dataset contained binding measurements for only 35 of the 95 alleles analyzed here. The ADT model, as well as other prediction models (10), can provide predictions for novel HLA–peptide combinations by pooling information from other related alleles from which binding data were provided. Clearly, the ability to provide predictions for novel HLA alleles is a major advance, but it also is expected that the performance of HLA predictors is correlated tightly with the amount of training data available for each HLA (5). Our training data included 633 HLA–peptide measurements for A\*24 alleles and 2,196 HLA–peptide measurements for A\*6801, but did not contain any data on B\*39 or A\*32 alleles. We therefore expect our predictions for A\*32 and B\*39 to be noisier than those for A\*24 alleles and A\*6801.

**T-Cell Enrichment.** Peripheral blood mononuclear cells (PBMCs) were obtained by venipuncture and subsequent isolation by standard Ficoll-Hypaque density gradient centrifugation within 24 h of blood draw. Cells were cryopreserved and stored in liquid nitrogen. Where indicated, PBMCs were enriched for CD4<sup>+</sup> or CD8<sup>+</sup> T-cell populations. CD4<sup>+</sup> T cells were selected magnetically using CD4 microbeads (Miltenyi Biotec) following manufacturer instructions using MS columns, followed by selection of CD8<sup>+</sup> T cells using CD8 microbeads (Miltenyi Biotec). Cells obtained within the second flow-through were used immediately as antigen-presenting cells in subsequent enzyme-linked immunosorbent spot (ELISpot) assays.

**IFN- $\gamma$  ELISpot Assay.** MultiScreen-IP 96-well plates (Millipore) were precoated with anti-human IFN- $\gamma$  monoclonal antibody (clone 1-D1K; Mabtech) overnight at 4 °C. For whole PBMC fractions, cells were incubated with  $\beta$ -propiolactone-inactivated A/California/04/09 (H1N1), A/Brisbane/59/2007 (H1N1), A/Brisbane/10/2007 (H3N2), media alone, or Con A for 4 h at 37 °C. Stimulated cells were washed and plated at  $1 \times 10^5$  cells per well in duplicate or triplicate per condition. Responder PBMCs were added at  $1 \times 10^5$  cells per well and after a 48-h incubation were incubated with biotinylated anti-human IFN- $\gamma$  mAb (clone 7-B6-1; Mabtech). IFN- $\gamma$  spot counts were enumerated using a Zeiss Axioptan 2 microscope and KS ELISPOT software.

**Statistical Analysis.** Correlation coefficients reported were computed using Pearson correlations. Analysis was performed using Matlab software. A mixed effects model was used to test for differences between the HLA-A and HLA-B alleles to pH1N1, adjusting for HLA supertypes and two-digit families. This study was conducted in compliance with 45 CFR 46 and the Declaration of Helsinki. Institutional review boards of St. Jude Children's Research Hospital and the University of Tennessee Health Science Center / Le Bonheur Children's Hospital approved the study. Written, informed consent was obtained from participants or their parents/guardians as well as assent from age-appropriate subjects at the time of enrollment.

- Middleton D, Menchaca L, Rood H, Komerofsky R (2003) New allele frequency database: <http://www.allelefrequencies.net>. *Tissue Antigens* 61(5):403–407.
- European Center for Disease Prevention and Control (2009) Reported new confirmed cases and cumulative number of influenza A(H1N1)v in the EU and EFTA countries. Available at <http://reliefweb.int/map/world/europe-reported-cumulative-number-confirmed-fatal-cases-influenza-h1n1v-eu-and-efta>. Accessed October 25, 2009.
- Durbin R, Eddy SR, Krogh A, Mitchison G (1998) *Biological Sequence Analysis: Probabilistic Models of Proteins and Nucleic Acids* (Cambridge Univ Press, Cambridge, UK).
- Jojic N, Reyes-Gomez M, Heckerman D, Kadie C, Schueler-Furman O (2006) Learning MHC I-peptide binding. *Bioinformatics* 22(14):e227–e235.
- Lin HH, Ray S, Tongchusak S, Reinherz EL, Brusic V (2008) Evaluation of MHC class I peptide binding prediction servers: applications for vaccine research. *BMC Immunol* 9(1):8.
- Berezin C, et al. (2004) ConSeq: The identification of functionally and structurally important residues in protein sequences. *Bioinformatics* 20(8):1322–1324.
- Mayrose I, Graur D, Ben-Tal N, Pupko T (2004) Comparison of site-specific rate-inference methods for protein sequences: Empirical Bayesian methods are superior. *Mol Biol Evol* 21(9):1781–1791.
- Bao Y, et al. (2008) The influenza virus resource at the National Center for Biotechnology Information. *J Virol* 82(2):596–601.
- Peters B, et al. (2005) The immune epitope database and analysis resource: From vision to blueprint. *PLoS Biol* 3(3):e91.
- Zhang H, Lundegaard C, Nielsen M (2009) Pan-specific MHC class I predictors: A benchmark of HLA class I pan-specific prediction methods. *Bioinformatics* 25(1):83–89.

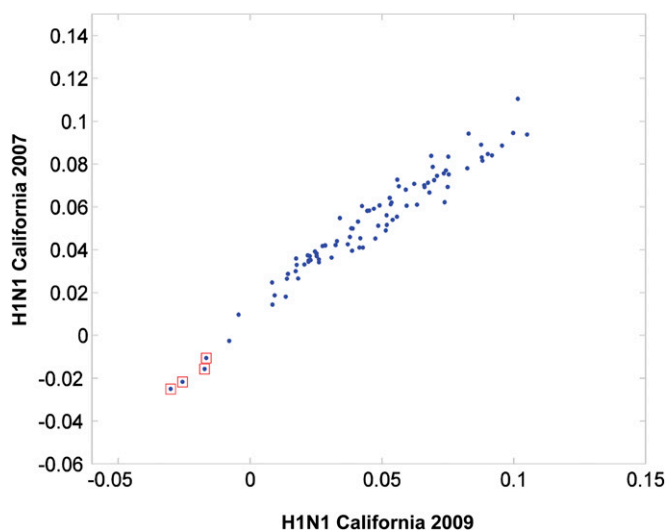

**Fig. S1.** Comparing the HLA targeting efficiency scores of pH1N1 to a seasonal 2007 H1N1 strain. HLA targeting efficiency scores for A/California/UR06-0321/2007(H1N1) (y-axis) plotted against scores for the pH1N1 2009 strain (x-axis). A\*24 alleles are marked by red  $\square$ .







**Table S2. List of all populations worldwide that carry either the A\*6801 or B\*39 allele with a phenotypic frequency greater than 5%**

| Population                        | Allele | Frequency, % |
|-----------------------------------|--------|--------------|
| Brazil Terena                     | A*6801 | 25.0         |
| Argentina Rosario Toba            | A*6801 | 22.1         |
| Mexico Sonora Seri                | A*6801 | 19.7         |
| USA Alaska Yupik Natives          | A*6801 | 15.5         |
| Mexico Mixtec Oaxaca              | A*6801 | 13.7         |
| India Khandesh Pawra              | A*6801 | 12.0         |
| Mexico Zaptotec Oaxaca            | A*6801 | 11.2         |
| Burkina Faso Mossi                | A*6801 | 9.4          |
| Mexico Chihuahua State Tarahumara | A*6801 | 9.1          |
| Ecuador Cayapa                    | A*6801 | 9.0          |
| South Africa Natal Tamil          | A*6801 | 8.0          |
| Pakistan Sindhi                   | A*6801 | 7.7          |
| India Mumbai Marathas             | A*6801 | 7.5          |
| Pakistan Kalash                   | A*6801 | 7.5          |
| India Tamil Nadu Nadar            | A*6801 | 7.4          |
| Senegal Niokholo Mandenka         | A*6801 | 7.0          |
| Georgia Tibilisi Kurds            | A*6801 | 6.7          |
| Georgia Svaneti Svans             | A*6801 | 6.3          |
| Mexico Mestizos                   | A*6801 | 6.1          |
| India West Bhils                  | A*6801 | 6.0          |
| Portugal Centre                   | A*6801 | 6.0          |
| Belgium                           | A*6801 | 5.7          |
| Mexico Mixe Oaxaca                | A*6801 | 5.6          |
| Saudi Arabia Guraiat and Hall     | A*6801 | 5.6          |
| USA North American Native         | A*6801 | 5.6          |
| USA South Texas Hispanics         | A*6801 | 5.2          |
| Taiwan Saisiat                    | B*3901 | 54.9         |
| Taiwan Tsou                       | B*3901 | 24.5         |
| South Dakota Lakota Sioux         | B*3901 | 22.5         |
| Taiwan Taroko                     | B*3901 | 21.8         |
| Taiwan Atayal                     | B*3901 | 19.8         |
| PNG Wanigela                      | B*3901 | 16.7         |
| Japan Ainu Hokkaido               | B*3901 | 16.0         |
| Taiwan Bunun                      | B*3901 | 14.9         |
| New Mexico Canonicito Navajo      | B*3901 | 14.6         |
| Taiwan Thao                       | B*3901 | 13.3         |
| Taiwan Rukai                      | B*3901 | 13.0         |
| Taiwan Ami                        | B*3901 | 10.2         |
| USA Hawaii Okinawa                | B*3901 | 7.7          |
| Papua New Guinea Wosera           | B*3901 | 7.0          |
| Papua New Guinea Madang           | B*3901 | 6.4          |
| Mexico Mixtec Oaxaca              | B*3901 | 5.9          |
| Mexico Mixe Oaxaca                | B*3902 | 38.7         |
| Mexico Zaptotec Oaxaca            | B*3902 | 13.4         |
| Mexico Mixtec Oaxaca              | B*3902 | 5.9          |
| PNG New Britain Rabaul            | B*3903 | 13.2         |
| Brazil Terena                     | B*3903 | 11.2         |
| Argentina Toba Rosario            | B*3903 | 5.2          |
| Venezuela Perija Yucpa            | B*3905 | 36.1         |
| Mexico Zaptotec Oaxaca            | B*3905 | 12.7         |
| Mexico Mixtec Oaxaca              | B*3905 | 9.8          |
| Venezuela Perija Mountain Bari    | B*3906 | 23.9         |
| Mexico Mixtec Oaxaca              | B*3906 | 8.8          |
| USA Arizona Pima                  | B*3906 | 7.3          |
| USA South Texas Hispanics         | B*3906 | 5.6          |
| Venezuela Perija Yucpa            | B*3909 | 34.9         |
